# Supplementary material for: Cause-specific mortality for 249 causes in Brazil and states during 1990–2015: a systematic analysis for the global burden of disease study 2015
Source: Springer Nature journal article supplement (doi:10.1186/s12963-017-0156-y), 2017-11-22

These numbers are under embargo by the Lancet and may not be circulated.

Single
Explore
Compare ▼

**Shared Settings** Use basic settings

**Display** Cause Risk  
Etiology Impairment

**Cause** B.8.4 Urinary diseases and ... ▼

**Metric** Deaths ▼

**Location** Brazil ▼

**Sex** Male Female Both

**Units** # Rate %

**Uncertainty** On

---

**Top chart Settings**

**Age** 50-69 years ▼

---

**Bottom chart Settings**

**Age** 70+ years ▼

[Take tour ▶](#)

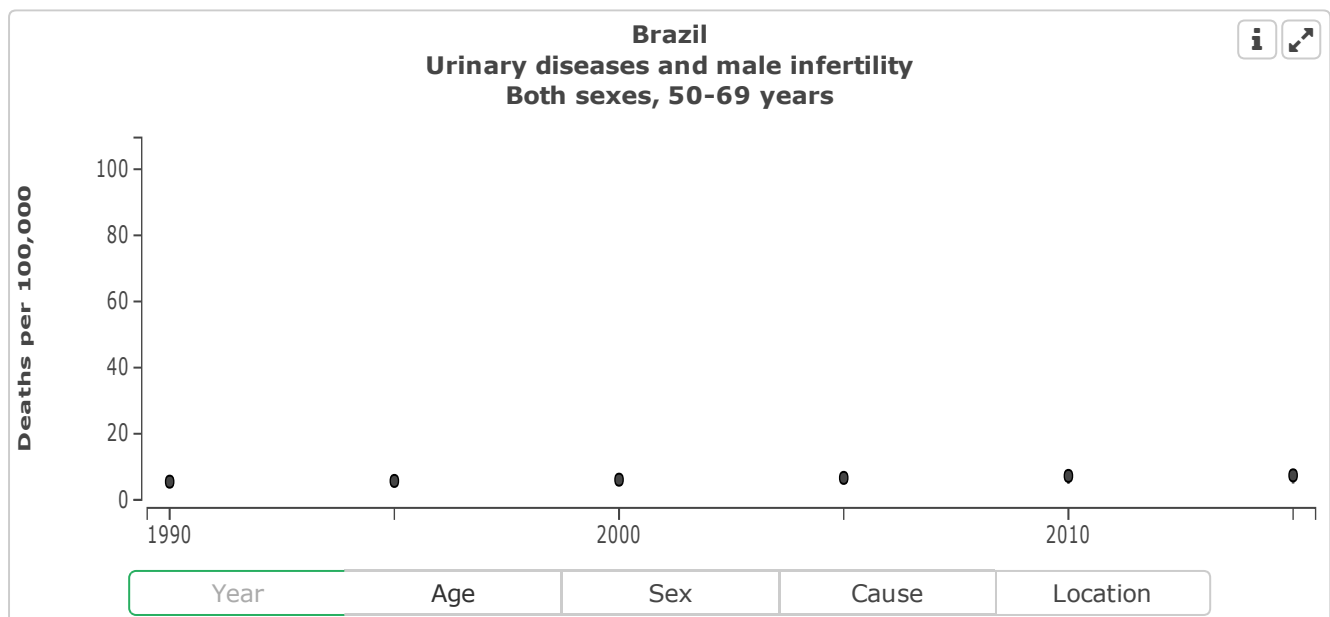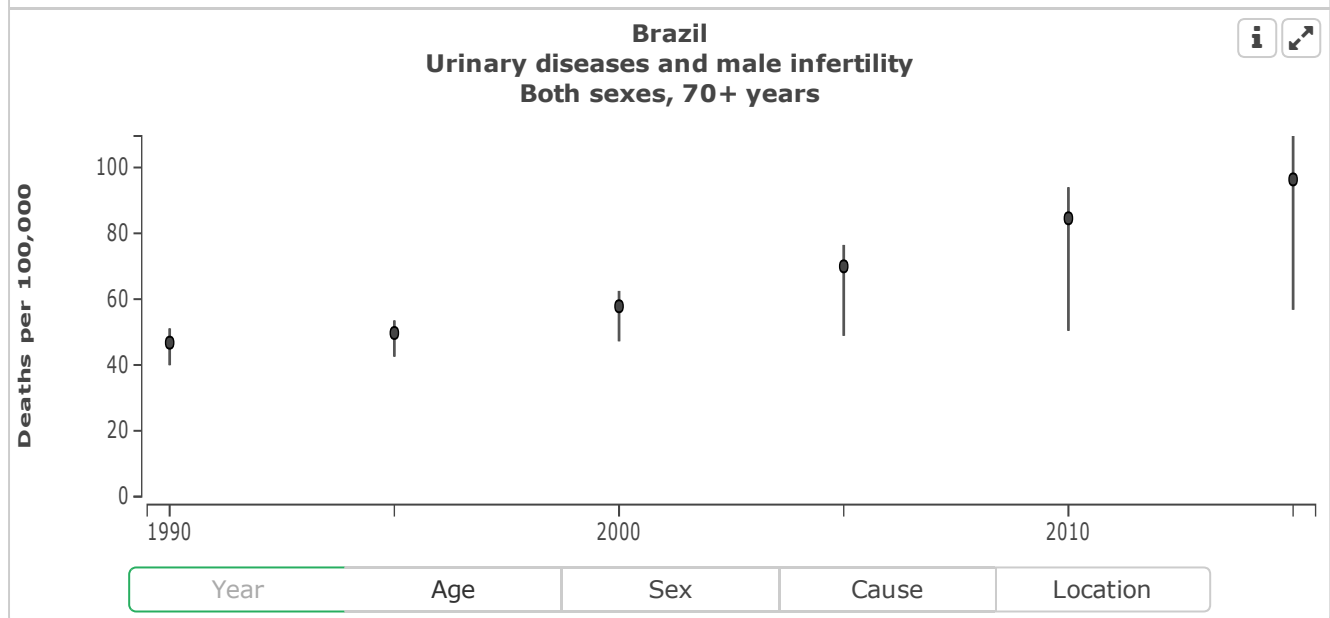

Supplement: MOESM6 [file 15246802]
